# Supplementary material for: The structural characterization of a glucosylglycerate hydrolase provides insights into the molecular mechanism of mycobacterial recovery from nitrogen starvation
Source: PubMed Central journal article supplement (PMC6608630; doi:10.1107/s2052252519005372), 2019-05-08
Supplement: m-06-00572-sup1.pdf [file m-06-00572-sup1.pdf]

# IUCrJ

**Volume 6 (2019)**

**Supporting information for article:**

**The structural characterization of a glucosylglycerate hydrolase provides insights into the molecular mechanism of mycobacterial recovery from nitrogen starvation**

**Tatiana Barros Cereija, Susana Alarico, Eva C. Lourenço, José António Manso, M. Rita Ventura, Nuno Empadinhas, Sandra Macedo-Ribeiro and Pedro José Barbosa Pereira**

**Table S1** Analysis of the quaternary structure of *MhGgH*. The total surface and total interface areas of each monomer (upper table) and the intermonomer area and interactions (lower table) were determined using *PISA* (Krissinel & Henrick, 2007).

| Monomer | Total surface area ( $\text{\AA}^2$ ) | Total interface area ( $\text{\AA}^2$ ) |  |
|---------|---------------------------------------|-----------------------------------------|--|
| A       | 17378                                 | 1637                                    |  |
| B       | 17218                                 | 1633                                    |  |
| C       | 17381                                 | 1639                                    |  |
| D       | 17216                                 | 1633                                    |  |
| Average | 17298                                 | 1636                                    |  |

  

| Interface | Interface area ( $\text{\AA}^2$ ) | Interface interaction |              |
|-----------|-----------------------------------|-----------------------|--------------|
|           |                                   | Hydrogen bonds        | Salt bridges |
| A:B       | 477                               | 0                     | 4            |
| C:D       | 478                               | 0                     | 4            |
| A:C       | 900                               | 14                    | 0            |
| B:D       | 895                               | 12                    | 0            |
| A:D       | 260                               | 1                     | 0            |
| B:C       | 261                               | 1                     | 0            |

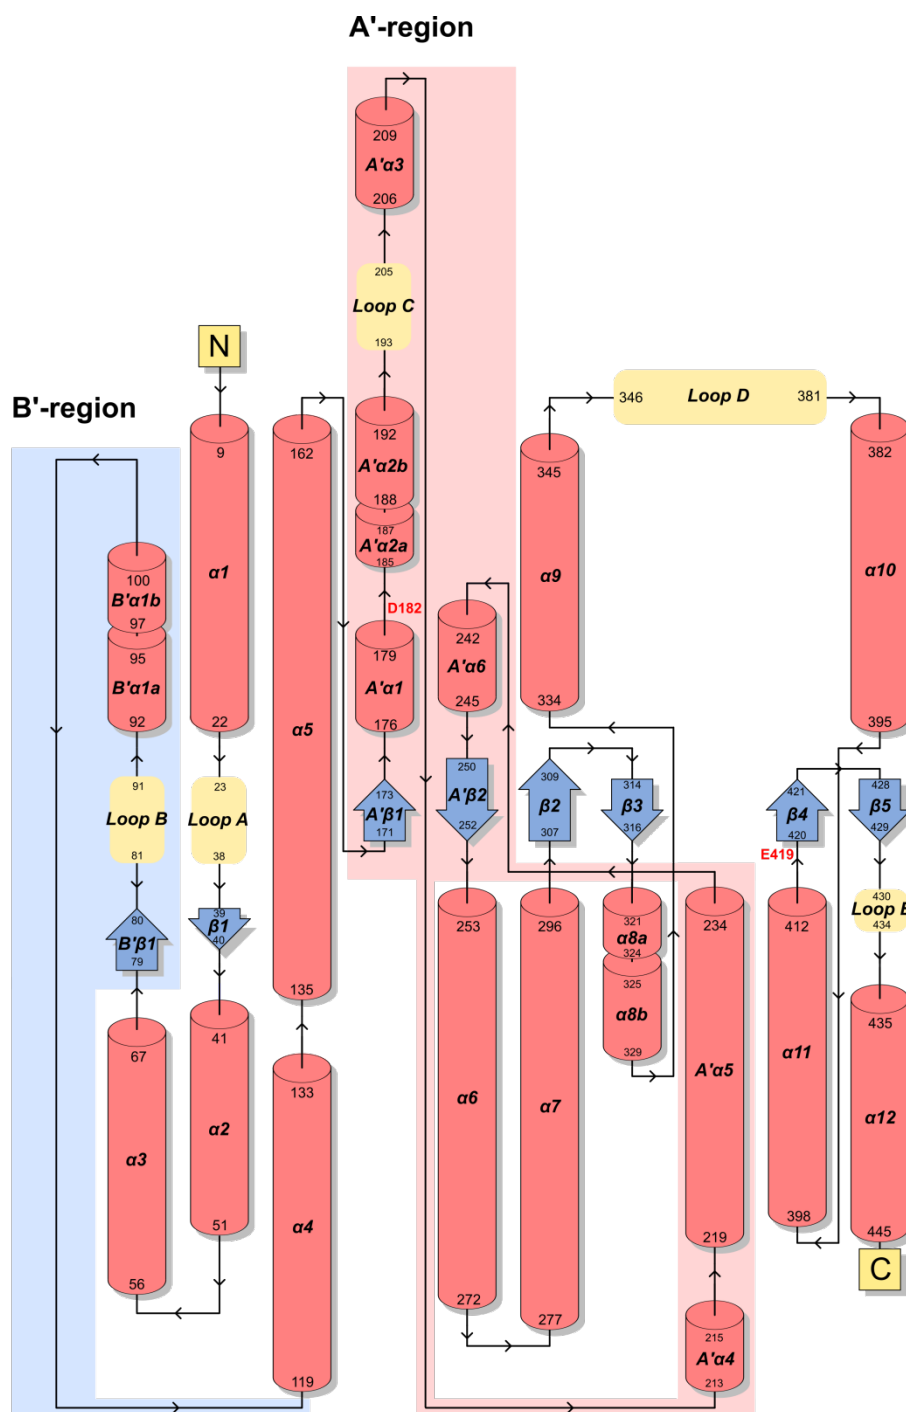

**Figure S1** Topology diagram of *MhGgH*. Helices ( $\alpha 1$  to  $\alpha 12$ ,  $A'\alpha 1$  to  $A'\alpha 6$ , and  $B'\alpha 1$ ), strands ( $\beta 1$  to  $\beta 5$ ,  $A'\beta 1$  to  $A'\beta 2$ , and  $B'\beta 1$ ) and mobile loops (loop A to loop E) are represented as salmon cylinders, blue arrows and yellow quadrilaterals, respectively. Catalytic residues are labelled red. The A' and B'-regions are highlighted by pink and blue shapes, respectively.

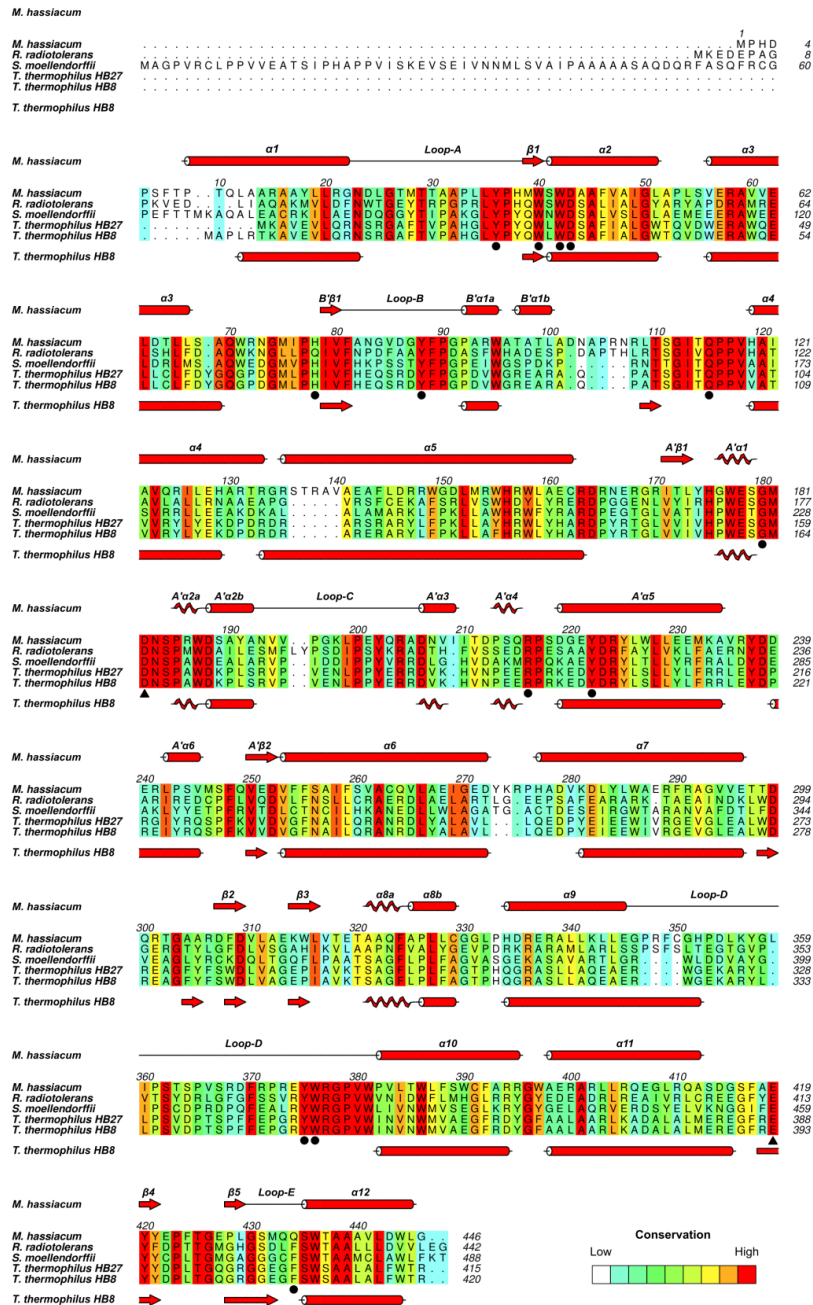

**Figure S2** Amino-acid sequence alignment of characterized mannosyl(glycosyl)glycerate hydrolases. Amino-acid sequences of *Mycobacterium hassiacum* GgH (GenBank: EKF25940.1) and of MgH enzymes from *Rubrobacter radiotolerans* (GenBank: AFC76324.1), *Selaginella moellendorffii* (GenBank: XP\_002961898.1), *Thermus thermophilus* HB27 (GenBank: WP\_011173059.1) and *T. thermophilus* HB8 (GenBank: WP\_011228344.1) were aligned with *Clustal Omega* (Sievers *et al.*, 2011). Secondary structure elements of *M. hassiacum* GgH and *T. thermophilus* HB8 MgH were identified with *DSSP* (Kabsch & Sander, 1983) and are indicated above and below the alignment, respectively. Residues are coloured from white to red according to increasing conservation. Catalytic residues (*M. hassiacum* Asp182 and Glu419) are marked with black triangles and other substrate-interacting residues with black circles. Figure prepared with *ALINE* (Bond & Schuttelkopf, 2009).

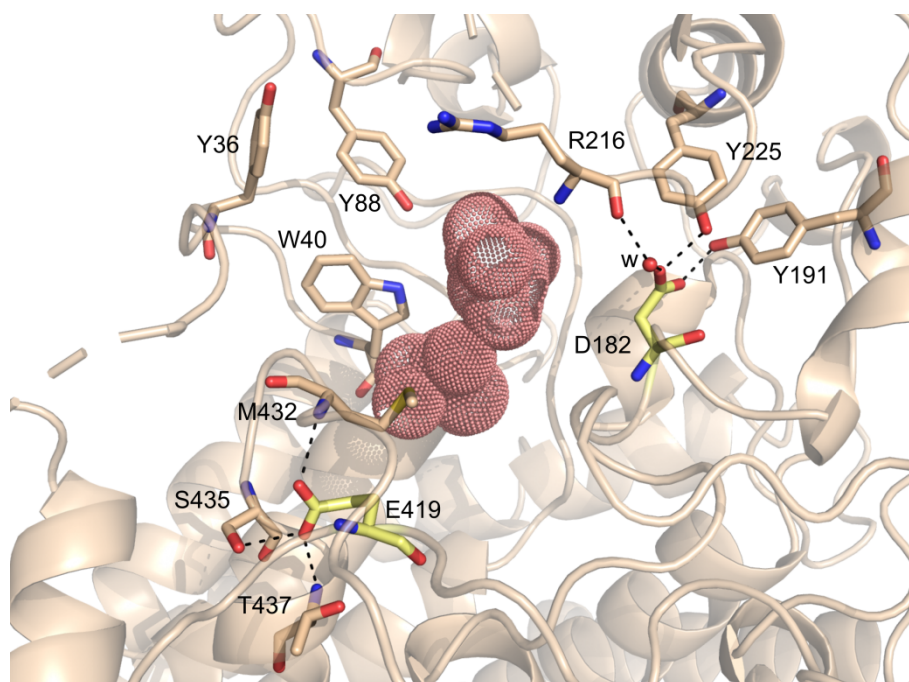

**Figure S3** Active-site region of *MhGgH* in the open state. Catalytic residues (yellow sticks) are pointing away from the active-site cavity (salmon spheres), stabilized by direct hydrogen bonds and by water (w)-mediated contacts with the neighbour residues (dashed lines).

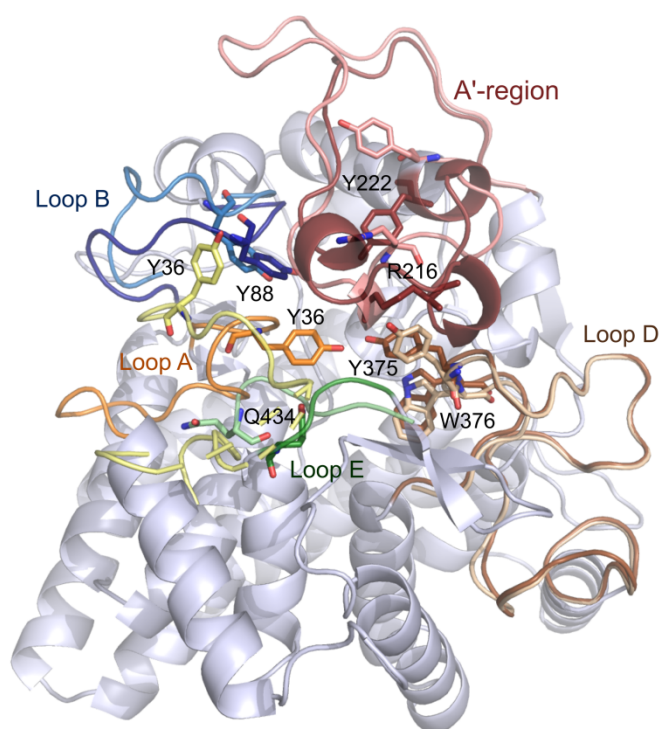

**Figure S4** Conformational changes in *MhGgH* induced by substrate binding. Open (lighter hues) and closed (darker hues) states of monomeric *MhGgH* are shown. The A'-region (flexible segment), and loops A, B, D and E are coloured salmon, yellow, blue, brown and green, respectively. Some of the substrate-interacting residues present in the highlighted regions [Tyr36 (loop A), Tyr88 (loop B), Arg216, Tyr222 (A'-region), Tyr375, Trp376 (loop D) and Gln434 (loop E)] are represented as sticks.

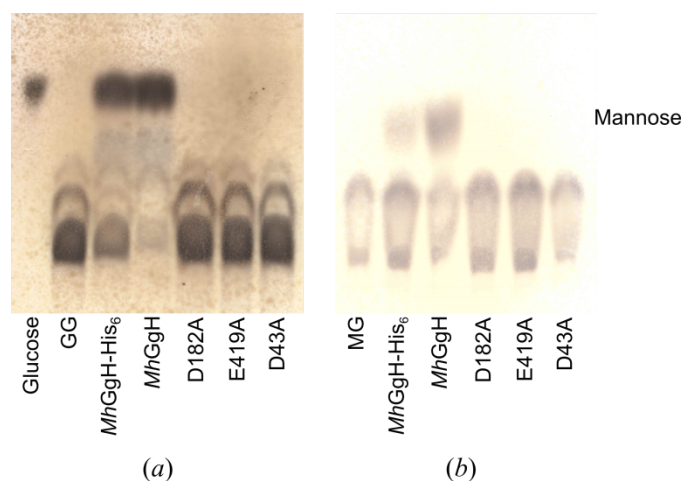

**Figure S5** Hydrolysis of GG and MG by *MhGgH* variants. The tagged (*MhGgH*-His<sub>6</sub>) and tag-less *MhGgH* were incubated with GG (a) and MG (b) and their ability to hydrolyse the compounds was evaluated by TLC. Both tagged and tag-less *MhGgH* variants were able to hydrolyse GG and MG, however a lower residual substrate amount was detected for the tag-less variant. None of the variants (D182A, E419A and D43A) produced a detectable amount of glucose or mannose.

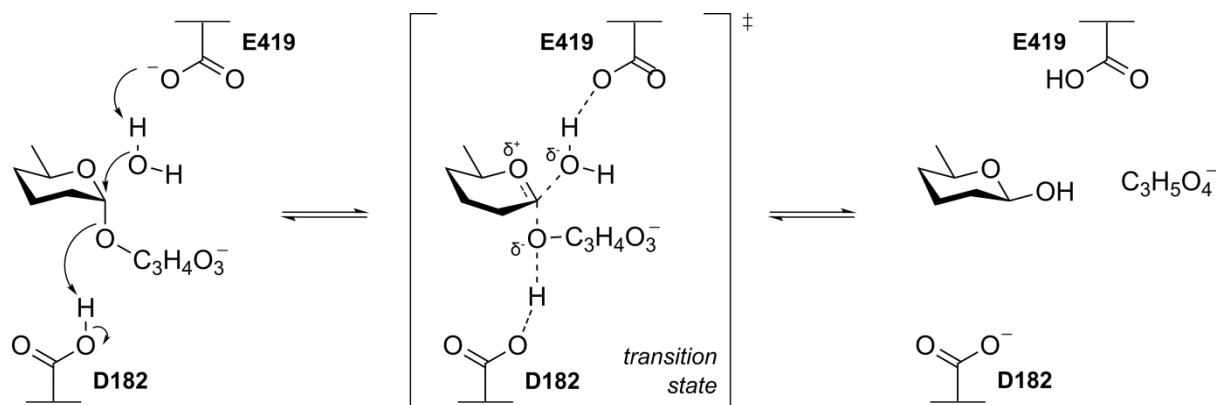

**Figure S6** Proposed hydrolysis mechanism of *MhGgH*. The hydrolysis of GG and MG by *MhGgH* is proposed to be performed by a classical inverting mechanism, in a single step, involving the catalytic residues Asp182 and Glu419 and the formation of a oxocarbenium ion-like transition state (adapted from Withers, S. and Williams, S. “Glycoside Hydrolases” in CAZypedia, available at URL <http://www.cazypedia.org/>, accessed 15 April 2019).



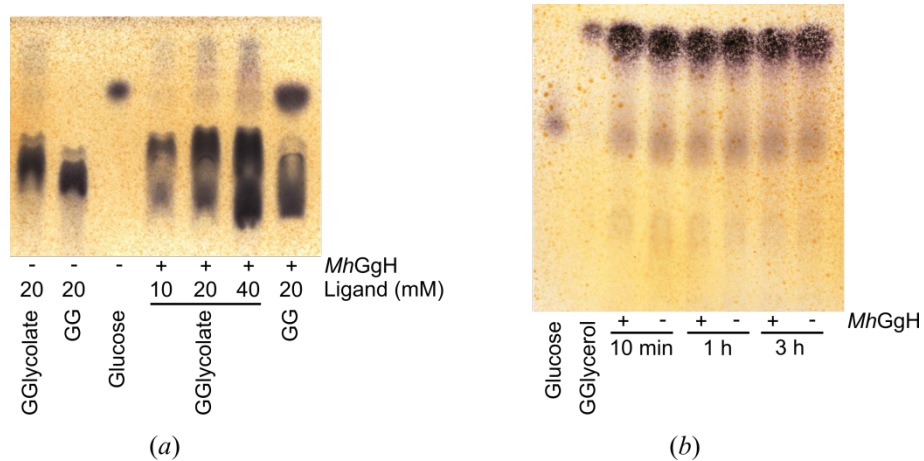

**Figure S7** Hydrolysis of GGlycolate and GGlycerol by *MhGgH*. The ability of *MhGgH* to hydrolyse GGlycolate (a) and GGlycerol (b) was evaluated by TLC. (a) Different concentrations of GGlycolate were incubated with *MhGgH* at 50°C for 2h. Glucose production was not detected for any of the concentrations tested. (b) *MhGgH* was incubated with GGlycerol for 10 min, 1h and 3h at 50°C. Production of glucose could not be observed.
